# Supplementary material for: Transcriptome analysis reveals the regulation of brassinosteroids on petal growth in Gerbera hybrida
Source: PeerJ. 2017 May 31;5:e3382. doi: 10.7717/peerj.3382 (PMC5455292; doi:10.7717/peerj.3382)
Supplement: Supplemental Information 5 — Class II DEGs were up-regulated after 0.5 h BL treatment and did not change markedly after 0.5 h H2O treatment. [file peerj-05-3382-s005.xlsx]

## Sheet: Sheet1
Supplemental Table S5. Differentially expressed genes in Class Ⅱ .
#ID	Mock	H 0.5	B 0.5	H 10	B 10	COG_class	COG_class_annotation	GO_annotation	KEGG_annotation	KOG_class	KOG_class_annotation	Pfam_annotation	Swissprot_annotation	nr_annotation
GACN01001575.1	6.89639	9.49376	31.8775	6.64548	9.34552	[O]	Posttranslational modification, protein turnover, chaperones	Cellular Component: cytoplasm (GO:0005737);; Biological Process: response to stress (GO:0006950);;	--	[O]	Posttranslational modification, protein turnover, chaperones	Hsp20/alpha crystallin family	17.3 kDa class II heat shock protein OS=Solanum peruvianum (Peruvian tomato) PE=1 SV=1	PREDICTED: 17.9 kDa class II heat shock protein [Vitis vinifera]
GACN01001749.1	305.844	257.334	726.877	84.5806	230.261	[O]	Posttranslational modification, protein turnover, chaperones	Molecular Function: ATP binding (GO:0005524);; Cellular Component: cell wall (GO:0005618);; Cellular Component: cytosol (GO:0005829);; Cellular Component: plasma membrane (GO:0005886);; Biological Process: protein folding (GO:0006457);; Biological Process: response to heat (GO:0009408);; Biological Process: response to high light intensity (GO:0009644);; Biological Process: defense response to ba…	K04079|0.0|rcu:RCOM_1582180|heat shock protein, putative	[O]	Posttranslational modification, protein turnover, chaperones	Hsp90 protein;; Histidine kinase-, DNA gyrase B-, and HSP90-like ATPase;; Histidine kinase-, DNA gyrase B-, and HSP90-like ATPase	Heat shock protein 83 GN=HSP83A OS=Ipomoea nil (Japanese morning glory) PE=2 SV=1	RecName: Full=Heat shock protein 83
GACN01002274.1	123.431	112.462	238.008	77.9678	113.717	--	--	--	--	--	--	--	--	PREDICTED: chaperone protein dnaJ 11, chloroplastic-like [Glycine max]
GACN01002323.1	611.848	527.541	1210.21	224.701	611.652	[O]	Posttranslational modification, protein turnover, chaperones	Molecular Function: ATP binding (GO:0005524);; Cellular Component: cell wall (GO:0005618);; Cellular Component: mitochondrion (GO:0005739);; Cellular Component: vacuolar membrane (GO:0005774);; Cellular Component: Golgi apparatus (GO:0005794);; Cellular Component: cytosol (GO:0005829);; Cellular Component: plasma membrane (GO:0005886);; Biological Process: protein folding (GO:0006457);; Biologica…	--	[O]	Posttranslational modification, protein turnover, chaperones	Hsp70 protein	Probable mediator of RNA polymerase II transcription subunit 37c GN=At3g12580 OS=Arabidopsis thaliana (Mouse-ear cress) PE=1 SV=1	high molecular weight heat shock protein [Malus domestica]
GACN01002324.1	3.55209	7.47519	21.9802	1.92729	4.38377	[O]	Posttranslational modification, protein turnover, chaperones	Molecular Function: ATP binding (GO:0005524);; Biological Process: response to stress (GO:0006950);; Molecular Function: 2-alkenal reductase [NAD(P)] activity (GO:0032440);; Biological Process: oxidation-reduction process (GO:0055114);;	--	[O]	Posttranslational modification, protein turnover, chaperones	Hsp70 protein;; Hydantoinase/oxoprolinase	Heat shock cognate 70 kDa protein 2 GN=HSC-2 OS=Solanum lycopersicum (Tomato) PE=1 SV=1	predicted protein [Hordeum vulgare subsp. vulgare]
GACN01005141.1	12.2426	13.4301	46.2056	12.1529	27.0075	--	--	Molecular Function: phosphorelay sensor kinase activity (GO:0000155);; Molecular Function: phosphorelay response regulator activity (GO:0000156);; Biological Process: phosphorelay signal transduction system (GO:0000160);; Molecular Function: phosphoprotein phosphatase activity (GO:0004721);; Molecular Function: osmosensor activity (GO:0005034);; Molecular Function: ATP binding (GO:0005524);; Biol…	K14489|1e-105|rcu:RCOM_1149450|histidine kinase 1, 2, 3 plant, putative (EC:2.7.13.3)	[T]	Signal transduction mechanisms	CHASE domain	Histidine kinase 4 GN=T23K3.2 OS=Arabidopsis thaliana (Mouse-ear cress) PE=1 SV=1	CHASE domain containing histidine kinase protein isoform 1 [Theobroma cacao]
GACN01005379.1	7.68243	12.2903	41.1131	4.38411	17.9747	--	--	Molecular Function: metal ion binding (GO:0046872);; Biological Process: response to stimulus (GO:0050896);;	--	[O]	Posttranslational modification, protein turnover, chaperones	Ring finger domain;; RING-H2 zinc finger;; Zinc finger, C3HC4 type (RING finger);; Zinc finger, C3HC4 type (RING finger);; Anaphase-promoting complex subunit 11 RING-H2 finger	E3 ubiquitin-protein ligase RING1 GN=RING1 OS=Gossypium hirsutum (Upland cotton) PE=2 SV=1	PREDICTED: E3 ubiquitin-protein ligase RING1-like [Glycine max]
GACN01006671.1	141.783	117.593	349.486	87.6935	150.608	[O]	Posttranslational modification, protein turnover, chaperones	Cellular Component: cytoplasm (GO:0005737);; Biological Process: response to stress (GO:0006950);;	K13993|1e-83|vvi:100254733|hypothetical protein LOC100254733	[O]	Posttranslational modification, protein turnover, chaperones	Hsp20/alpha crystallin family	18.5 kDa class I heat shock protein GN=HSP18.5-C OS=Glycine max (Soybean) PE=3 SV=1	18.6 kDa heat-shock protein [Helianthus annuus]
GACN01006799.1	8.72966	10.2992	24.7032	10.0851	17.0751	[O]	Posttranslational modification, protein turnover, chaperones	Biological Process: metabolic process (GO:0008152);; Molecular Function: amino acid binding (GO:0016597);;	--	--	--	ACT domain;; ACT domain;; ACT domain	--	PREDICTED: uncharacterized protein LOC100250497 [Vitis vinifera]
GACN01008096.1	6.41528	5.18558	20.3109	4.21637	7.0006	[O]	Posttranslational modification, protein turnover, chaperones	Cellular Component: cytoplasm (GO:0005737);; Biological Process: response to stress (GO:0006950);;	--	[O]	Posttranslational modification, protein turnover, chaperones	Hsp20/alpha crystallin family	17.5 kDa class I heat shock protein GN=HSP17.5-E OS=Glycine max (Soybean) PE=3 SV=1	17.6 kDa heat-shock protein [Helianthus annuus]
GACN01008275.1	16.7047	40.7774	91.996	11.5182	15.2112	--	--	Cellular Component: plant-type cell wall (GO:0009505);; Biological Process: response to brassinosteroid (GO:0009741);;	--	--	--	Phosphate-induced protein 1 conserved region	Proline-rich receptor-like protein kinase PERK1 GN=PERK1 OS=Arabidopsis thaliana (Mouse-ear cress) PE=1 SV=1	PREDICTED: uncharacterized protein LOC100259041 [Vitis vinifera]
GACN01010072.1	2.15128	3.37136	27.9803	0.247596	1.06199	[O]	Posttranslational modification, protein turnover, chaperones	Cellular Component: cytoplasm (GO:0005737);; Biological Process: response to stress (GO:0006950);;	--	[O]	Posttranslational modification, protein turnover, chaperones	Hsp20/alpha crystallin family	17.9 kDa class II heat shock protein GN=HSP17.9-D OS=Glycine max (Soybean) PE=3 SV=1	PREDICTED: 17.9 kDa class II heat shock protein-like [Vitis vinifera]
GACN01015877.1	2.01973	1.93869	12.3137	0.677995	9.3785	[C]	Energy production and conversion	Cellular Component: extracellular region (GO:0005576);; Molecular Function: UDP-N-acetylmuramate dehydrogenase activity (GO:0008762);; Biological Process: cytokinin catabolic process (GO:0009823);; Molecular Function: cytokinin dehydrogenase activity (GO:0019139);; Molecular Function: flavin adenine dinucleotide binding (GO:0050660);; Biological Process: oxidation-reduction process (GO:0055114);;	K00279|0.0|pop:POPTR_819456|cytokinin oxidase (EC:1.5.99.12)	[C]	Energy production and conversion	Cytokinin dehydrogenase 1, FAD and cytokinin binding;; FAD binding domain	Cytokinin dehydrogenase 7 GN=F13M11.? OS=Arabidopsis thaliana (Mouse-ear cress) PE=1 SV=1	cytokinin oxidase [Populus trichocarpa]
GACN01016978.1	8.29671	10.7076	39.6728	3.93189	7.58912	--	--	Cellular Component: extracellular region (GO:0005576);; Cellular Component: Golgi apparatus (GO:0005794);; Cellular Component: cytosol (GO:0005829);; Cellular Component: plant-type cell wall (GO:0009505);; Biological Process: response to brassinosteroid (GO:0009741);; Biological Process: sterol biosynthetic process (GO:0016126);;	--	--	--	Phosphate-induced protein 1 conserved region	--	phi-1 [Nicotiana tabacum]
GACN01018625.1	6.30591	18.6775	91.1412	2.03213	2.28801	--	--	--	--	--	--	BAG domain;; IQ calmodulin-binding motif	BAG family molecular chaperone regulator 5, mitochondrial (Precursor) GN=BAG5 OS=Arabidopsis thaliana (Mouse-ear cress) PE=1 SV=1	Uncharacterized protein TCM_008586 [Theobroma cacao]
GACN01022486.1	33.7583	37.0329	84.7009	35.8272	34.7721	--	--	--	--	--	--	--	--	UP-9A [Nicotiana tabacum]
GACN01022846.1	29.4457	32.0152	87.2472	22.9508	26.1906	--	--	Cellular Component: nucleus (GO:0005634);; Cellular Component: cytoplasm (GO:0005737);; Biological Process: protein folding (GO:0006457);; Biological Process: response to heat (GO:0009408);; Biological Process: response to high light intensity (GO:0009644);; Biological Process: response to salt stress (GO:0009651);; Molecular Function: Hsp70 protein binding (GO:0030544);; Biological Process: resp…	K09562|0.0|vvi:100261411|hypothetical protein LOC100261411	[O]	Posttranslational modification, protein turnover, chaperones	HEAT repeats;; Armadillo/beta-catenin-like repeat;; HEAT repeat;; V-ATPase subunit H;; HEAT-like repeat	ARM REPEAT PROTEIN INTERACTING WITH ABF2 GN=ARIA OS=Arabidopsis thaliana (Mouse-ear cress) PE=1 SV=2	PREDICTED: hsp70-binding protein 1-like [Glycine max]
GACN01023420.1	123.867	93.5011	247.681	110.061	184.254	[O]	Posttranslational modification, protein turnover, chaperones	--	--	[O]	Posttranslational modification, protein turnover, chaperones	DnaJ domain	Chaperone protein dnaJ 11, chloroplastic (Precursor) GN=T19K4.170 OS=Arabidopsis thaliana (Mouse-ear cress) PE=1 SV=2	PREDICTED: chaperone protein dnaJ 11, chloroplastic-like [Fragaria vesca subsp. vesca]
GACN01023831.1	1.98223	1.83997	7.68491	0.982757	2.37108	[R]	General function prediction only	Molecular Function: iron ion binding (GO:0005506);; Molecular Function: transcription factor binding (GO:0008134);; Biological Process: gibberellin biosynthetic process (GO:0009686);; Biological Process: response to gibberellin (GO:0009739);; Biological Process: seed germination (GO:0009845);; Biological Process: response to red light (GO:0010114);; Molecular Function: gibberellin 3-beta-dioxygen…	K04124|1e-177|vvi:100265167|hypothetical protein LOC100265167	[QR]	--	2OG-Fe(II) oxygenase superfamily;; non-haem dioxygenase in morphine synthesis N-terminal	Gibberellin 3-beta-dioxygenase 2 GN=F5I6.9 OS=Arabidopsis thaliana (Mouse-ear cress) PE=1 SV=2	gibberelin 3beta-hydroxylase [Lactuca sativa]
GACN01025777.1	29.406	30.5606	61.5075	13.4387	14.5589	--	--	--	--	--	--	Protein of unknown function (DUF1005)	Extensin (Precursor) GN=HRGPNT3 OS=Nicotiana tabacum (Common tobacco) PE=2 SV=1	Gb:AAC34331.1 [Theobroma cacao]
GACN01026015.1	2.46334	4.68396	15.619	1.19075	2.55368	--	--	Cellular Component: cytoplasm (GO:0005737);; Biological Process: protein folding (GO:0006457);; Biological Process: response to heat (GO:0009408);; Biological Process: response to high light intensity (GO:0009644);; Biological Process: response to hydrogen peroxide (GO:0042542);;	--	[O]	Posttranslational modification, protein turnover, chaperones	Hsp20/alpha crystallin family	17.4 kDa class III heat shock protein GN=HSP17.4B OS=Arabidopsis thaliana (Mouse-ear cress) PE=2 SV=1	PREDICTED: 17.4 kDa class III heat shock protein-like [Glycine max]
GACN01026124.1	41.9602	37.1212	92.8653	19.4107	43.4991	--	--	--	--	--	--	--	--	PREDICTED: uncharacterized protein LOC101255221 [Solanum lycopersicum]
GACN01026724.1	7.60318	6.31187	16.7878	5.04938	6.03579	--	--	Cellular Component: nucleus (GO:0005634);; Cellular Component: plant-type cell wall (GO:0009505);;	--	--	--	Protein of unknown function (DUF1005)	Arabinogalactan protein 1 (Precursor) OS=Oryza sativa subsp. japonica (Rice) PE=1 SV=1	PREDICTED: uncharacterized protein LOC100245695 [Vitis vinifera]
GACN01027501.1	0.652253	0.357761	11.3996	0	3.94436	--	--	Molecular Function: oxidoreductase activity (GO:0016491);;	K00279|1e-31|vvi:100242449|hypothetical protein LOC100242449	[C]	Energy production and conversion	FAD binding domain	Cytokinin dehydrogenase 3 (Precursor) GN=CKX3 OS=Arabidopsis thaliana (Mouse-ear cress) PE=1 SV=1	cytokinin oxidase/dehydrogenase-like, partial [Solanum lycopersicum]
GACN01029123.1	32.0329	29.0582	64.8482	27.7924	29.8018	--	--	Cellular Component: plasma membrane (GO:0005886);; Biological Process: polyamine catabolic process (GO:0006598);; Biological Process: phenylpropanoid metabolic process (GO:0009698);; Cellular Component: anchored component of membrane (GO:0031225);; Biological Process: cellular modified amino acid biosynthetic process (GO:0042398);;	--	--	--	--	Arabinogalactan peptide 12 (Precursor) GN=AGP12 OS=Arabidopsis thaliana (Mouse-ear cress) PE=1 SV=1	predicted protein [Populus trichocarpa]
GACN01029361.1	16.4117	30.9334	66.7655	24.4607	38.5383	[EH]	--	Biological Process: sulfate assimilation (GO:0000103);; Molecular Function: phosphoadenylyl-sulfate reductase (thioredoxin) activity (GO:0004604);; Cellular Component: chloroplast thylakoid (GO:0009534);; Cellular Component: chloroplast stroma (GO:0009570);; Biological Process: indoleacetic acid biosynthetic process (GO:0009684);; Molecular Function: adenylyl-sulfate reductase activity (GO:000997…	--	[E]	Amino acid transport and metabolism	Phosphoadenosine phosphosulfate reductase family;; Thioredoxin	5&apos;-adenylylsulfate reductase 1, chloroplastic (Precursor) GN=F4H6.13 OS=Arabidopsis thaliana (Mouse-ear cress) PE=1 SV=2	PAPS-reductase-like protein [Catharanthus roseus]
GACN01029465.1	37.6474	31.3537	102.053	10.399	22.5673	[O]	Posttranslational modification, protein turnover, chaperones	Biological Process: response to stress (GO:0006950);;	--	[O]	Posttranslational modification, protein turnover, chaperones	Hsp20/alpha crystallin family	Heat shock 22 kDa protein, mitochondrial (Precursor) GN=HSP22 OS=Pisum sativum (Garden pea) PE=2 SV=1	Mitochondrion-localized small heat shock protein 23.6, putative isoform 1 [Theobroma cacao]
GACN01029771.1	58.8016	37.6546	124.562	13.7686	39.2875	[O]	Posttranslational modification, protein turnover, chaperones	--	K13993|2e-86|pop:POPTR_769024|hypothetical protein	[O]	Posttranslational modification, protein turnover, chaperones	Hsp20/alpha crystallin family	25.3 kDa heat shock protein, chloroplastic (Precursor) GN=HSP25.3 OS=Arabidopsis thaliana (Mouse-ear cress) PE=2 SV=1	hypothetical protein PRUPE_ppa010762mg [Prunus persica]
GACN01029977.1	4.48998	5.56797	15.8691	0.471827	0.843235	[O]	Posttranslational modification, protein turnover, chaperones	Molecular Function: ATP binding (GO:0005524);; Cellular Component: cell wall (GO:0005618);; Cellular Component: cytosol (GO:0005829);; Cellular Component: plasma membrane (GO:0005886);; Biological Process: protein folding (GO:0006457);; Biological Process: response to heat (GO:0009408);; Biological Process: response to high light intensity (GO:0009644);; Biological Process: defense response to ba…	K04079|1e-157|vvi:100265661|hypothetical protein LOC100265661	[O]	Posttranslational modification, protein turnover, chaperones	Hsp90 protein	Heat shock protein 82 (Fragment) GN=HSP82 OS=Nicotiana tabacum (Common tobacco) PE=1 SV=1	heat shock protein 83 [Beta vulgaris]
GACN01029988.1	40.6462	31.0555	78.785	24.6209	32.0477	[O]	Posttranslational modification, protein turnover, chaperones	Molecular Function: protein binding (GO:0005515);; Molecular Function: ATP binding (GO:0005524);; Biological Process: ATP catabolic process (GO:0006200);; Biological Process: protein folding (GO:0006457);; Cellular Component: chloroplast stroma (GO:0009570);; Biological Process: response to high light intensity (GO:0009644);; Cellular Component: chloroplast envelope (GO:0009941);; Biological Proc…	--	[O]	Posttranslational modification, protein turnover, chaperones	AAA domain (Cdc48 subfamily);; ATPase family associated with various cellular activities (AAA);; C-terminal, D2-small domain, of ClpB protein;; Clp amino terminal domain;; AAA domain (dynein-related subfamily);; AAA ATPase domain;; AAA domain;; Sigma-54 interaction domain;; AAA domain;; AAA domain;; AAA domain;; IstB-like ATP binding protein;; Archaeal ATPase;; RNA helicase;; Zeta toxin;; NACHT d…	Chaperone protein ClpB1 GN=F1O17.2 OS=Arabidopsis thaliana (Mouse-ear cress) PE=1 SV=2	heat shock protein 101 [Vitis vinifera]
GACN01030317.1	8.69671	24.7451	50.5913	0.87581	2.8174	--	--	Cellular Component: intracellular (GO:0005622);; Molecular Function: zinc ion binding (GO:0008270);; Biological Process: cellular process (GO:0009987);;	--	[K]	Transcription	CCT motif	Zinc finger protein CONSTANS-LIKE 4 GN=COL4 OS=Arabidopsis thaliana (Mouse-ear cress) PE=2 SV=2	PREDICTED: zinc finger protein CONSTANS-LIKE 5-like [Vitis vinifera]
GACN01030883.1	16.6079	30.8146	83.5029	18.3357	23.3811	--	--	Molecular Function: structural constituent of cell wall (GO:0005199);; Molecular Function: protein binding (GO:0005515);; Cellular Component: plant-type cell wall (GO:0009505);; Cellular Component: plasmodesma (GO:0009506);; Cellular Component: cytoplasmic membrane-bounded vesicle (GO:0016023);;	--	--	--	--	Leucine-rich repeat extensin-like protein 3 (Precursor) GN=LRX3 OS=Arabidopsis thaliana (Mouse-ear cress) PE=1 SV=1	PREDICTED: leucine-rich repeat extensin-like protein 4-like [Solanum lycopersicum]
GACN01031328.1	9.74313	13.7912	40.8782	5.82384	9.50313	--	--	Molecular Function: structural constituent of cell wall (GO:0005199);; Cellular Component: extracellular region (GO:0005576);; Cellular Component: plant-type cell wall (GO:0009505);; Cellular Component: plasmodesma (GO:0009506);;	--	--	--	--	Leucine-rich repeat extensin-like protein 4 (Precursor) GN=LRX4 OS=Arabidopsis thaliana (Mouse-ear cress) PE=1 SV=1	predicted protein [Populus trichocarpa]
GACN01034181.1	1.56615	1.43172	8.48743	3.1544	2.93147	--	--	Biological Process: organelle organization (GO:0006996);; Biological Process: anatomical structure morphogenesis (GO:0009653);; Biological Process: epidermal cell differentiation (GO:0009913);; Molecular Function: oxidoreductase activity, acting on CH-OH group of donors (GO:0016614);; Biological Process: cell development (GO:0048468);;	--	--	--	--	Reticuline oxidase-like protein (Precursor) GN=At4g20830 OS=Arabidopsis thaliana (Mouse-ear cress) PE=1 SV=2	FAD-binding Berberine family protein [Theobroma cacao]
GACN01037515.1	14.0662	35.2522	83.4804	11.6088	21.7349	[O]	Posttranslational modification, protein turnover, chaperones	Cellular Component: cytoplasm (GO:0005737);; Biological Process: protein folding (GO:0006457);; Biological Process: response to heat (GO:0009408);; Biological Process: response to high light intensity (GO:0009644);; Molecular Function: heat shock protein binding (GO:0031072);; Biological Process: response to endoplasmic reticulum stress (GO:0034976);; Biological Process: response to hydrogen pero…	--	[O]	Posttranslational modification, protein turnover, chaperones	DnaJ domain;; DnaJ C terminal domain	DnaJ protein homolog 2 (Precursor) GN=LDJ2 OS=Allium porrum (Leek) PE=2 SV=1	uncharacterized protein LOC100778672 [Glycine max]
GACN01038116.1	10.5301	7.13754	24.775	11.2425	12.573	[Q]	Secondary metabolites biosynthesis, transport and catabolism	Molecular Function: iron ion binding (GO:0005506);; Molecular Function: electron carrier activity (GO:0009055);; Biological Process: abscisic acid metabolic process (GO:0009687);; Biological Process: response to red light (GO:0010114);; Molecular Function: (+)-abscisic acid 8'-hydroxylase activity (GO:0010295);; Molecular Function: oxygen binding (GO:0019825);; Molecular Function: heme binding (G…	K09843|0.0|pop:POPTR_703119|CYP707A13	[QI]	--	Cytochrome P450	Abscisic acid 8&apos;-hydroxylase 4 GN=CYP707A4 OS=Arabidopsis thaliana (Mouse-ear cress) PE=2 SV=2	ABA 8-oxidase [Lactuca sativa]
GACN01039507.1	3.42232	2.81571	21.2127	0	1.47826	--	--	Cellular Component: cytoplasm (GO:0005737);; Biological Process: response to stress (GO:0006950);;	--	[O]	Posttranslational modification, protein turnover, chaperones	Hsp20/alpha crystallin family	17.9 kDa class II heat shock protein GN=HSP17.9 OS=Helianthus annuus (Common sunflower) PE=2 SV=1	unnamed protein product [Vitis vinifera]
GACN01039604.1	8.52572	14.1627	52.672	6.7706	24.5161	[T]	Signal transduction mechanisms	Biological Process: signal transduction (GO:0007165);; Biological Process: response to red or far red light (GO:0009639);; Biological Process: cellular metabolic process (GO:0044237);;	K14492|1e-92|rcu:RCOM_0699760|two-component sensor protein histidine protein kinase, putative	[K]	Transcription	Response regulator receiver domain	Two-component response regulator ARR4 GN=T10O24.8 OS=Arabidopsis thaliana (Mouse-ear cress) PE=1 SV=1	two-component sensor protein histidine protein kinase, putative [Ricinus communis]
GACN01039722.1	19.3093	14.7986	38.1661	17.2613	26.0502	[T]	Signal transduction mechanisms	Molecular Function: phosphorelay sensor kinase activity (GO:0000155);; Molecular Function: phosphorelay response regulator activity (GO:0000156);; Biological Process: phosphorelay signal transduction system (GO:0000160);; Molecular Function: phosphoprotein phosphatase activity (GO:0004721);; Molecular Function: osmosensor activity (GO:0005034);; Molecular Function: ATP binding (GO:0005524);; Cell…	K14489|4e-67|rcu:RCOM_1149450|histidine kinase 1, 2, 3 plant, putative (EC:2.7.13.3)	[T]	Signal transduction mechanisms	Response regulator receiver domain	Histidine kinase 4 GN=T23K3.2 OS=Arabidopsis thaliana (Mouse-ear cress) PE=1 SV=1	unnamed protein product [Vitis vinifera]
GACN01041579.1	1.57147	1.03434	9.96407	1.64587	2.17214	[O]	Posttranslational modification, protein turnover, chaperones	--	--	[O]	Posttranslational modification, protein turnover, chaperones	Hsp20/alpha crystallin family	23.6 kDa heat shock protein, mitochondrial (Precursor) GN=HSP23.6 OS=Arabidopsis thaliana (Mouse-ear cress) PE=2 SV=1	PREDICTED: small heat shock protein, chloroplastic-like [Cucumis sativus]
GACN01041964.1	24.0247	45.7272	103.657	30.0257	45.501	--	--	Cellular Component: extracellular region (GO:0005576);;	--	--	--	Phosphate-induced protein 1 conserved region	--	PREDICTED: uncharacterized protein LOC101252337 [Solanum lycopersicum]
GACN01042292.1	19.561	25.137	72.9179	24.5395	23.1754	--	--	Biological Process: cell communication (GO:0007154);; Biological Process: response to brassinosteroid (GO:0009741);; Biological Process: cellular metabolic process (GO:0044237);; Biological Process: single organism signaling (GO:0044700);; Biological Process: negative regulation of growth (GO:0045926);; Biological Process: organic substance metabolic process (GO:0071704);;	--	--	--	Rapid ALkalinization Factor (RALF)	Rapid alkalinization factor 23 (Precursor) GN=MGL6.2 OS=Arabidopsis thaliana (Mouse-ear cress) PE=1 SV=1	PREDICTED: uncharacterized protein LOC100775931 [Glycine max]
GACN01042426.1	6.13538	5.81272	14.6222	8.76251	18.6716	--	--	Cellular Component: cytoplasm (GO:0005737);; Biological Process: heat acclimation (GO:0010286);;	--	--	--	GRAM domain	GEM-like protein 5 GN=At5g13200 OS=Arabidopsis thaliana (Mouse-ear cress) PE=1 SV=1	GRAM domain family protein [Theobroma cacao]
GACN01042640.1	22.5576	35.7438	135.897	11.7118	40.9236	[K]	Transcription	Molecular Function: sequence-specific DNA binding transcription factor activity (GO:0003700);; Molecular Function: transcription coactivator activity (GO:0003713);; Cellular Component: nucleolus (GO:0005730);; Biological Process: protein folding (GO:0006457);; Biological Process: response to heat (GO:0009408);; Biological Process: response to water deprivation (GO:0009414);; Biological Process: r…	K03627|3e-65|vvi:100249249|hypothetical protein LOC100249249	[K]	Transcription	Multiprotein bridging factor 1;; Helix-turn-helix	Multiprotein-bridging factor 1c GN=MBF1C OS=Arabidopsis thaliana (Mouse-ear cress) PE=1 SV=1	ethylene-responsive transciptional coactivator-like protein [Retama raetam]
GACN01043054.1	23.8475	51.7948	184.879	16.118	39.1296	--	--	--	--	[O]	Posttranslational modification, protein turnover, chaperones	Ring finger domain;; Zinc finger, C3HC4 type (RING finger);; Zinc finger, C3HC4 type (RING finger);; Zinc finger, C3HC4 type (RING finger)	E3 ubiquitin-protein ligase RING1-like GN=At3g19950 OS=Arabidopsis thaliana (Mouse-ear cress) PE=2 SV=1	PREDICTED: E3 ubiquitin-protein ligase RING1-like [Vitis vinifera]
GACN01043473.1	10.0656	14.9067	56.949	17.6784	43.9131	[K]	Transcription	Molecular Function: DNA binding (GO:0003677);; Molecular Function: sequence-specific DNA binding transcription factor activity (GO:0003700);; Molecular Function: protein binding (GO:0005515);; Cellular Component: nucleus (GO:0005634);; Biological Process: protein folding (GO:0006457);; Biological Process: toxin catabolic process (GO:0009407);; Cellular Component: chloroplast (GO:0009507);; Biolog…	--	[K]	Transcription	HSF-type DNA-binding	Heat shock factor protein HSF30 GN=HSF30 OS=Solanum peruvianum (Peruvian tomato) PE=2 SV=1	hypothetical protein PRUPE_ppa007300mg [Prunus persica]
GACN01046241.1	0.36961	1.35154	13.9211	0.397034	3.83166	[C]	Energy production and conversion	Molecular Function: UDP-N-acetylmuramate dehydrogenase activity (GO:0008762);; Biological Process: cytokinin metabolic process (GO:0009690);; Molecular Function: cytokinin dehydrogenase activity (GO:0019139);; Cellular Component: intracellular membrane-bounded organelle (GO:0043231);; Cellular Component: cytoplasmic part (GO:0044444);; Molecular Function: flavin adenine dinucleotide binding (GO:0…	K00279|0.0|vvi:100242449|hypothetical protein LOC100242449	[C]	Energy production and conversion	Cytokinin dehydrogenase 1, FAD and cytokinin binding;; FAD binding domain	Cytokinin dehydrogenase 3 (Precursor) GN=CKX3 OS=Arabidopsis thaliana (Mouse-ear cress) PE=1 SV=1	cytokinin oxidase [Petunia x hybrida]
GACN01046316.1	2.79239	2.78477	11.556	2.24968	6.14048	--	--	Molecular Function: phosphorelay response regulator activity (GO:0000156);; Biological Process: phosphorelay signal transduction system (GO:0000160);; Cellular Component: nucleus (GO:0005634);; Biological Process: regulation of transcription, DNA-templated (GO:0006355);; Biological Process: circadian rhythm (GO:0007623);; Cellular Component: plastid (GO:0009536);; Biological Process: cytokinin-ac…	K14492|8e-56|vvi:100253216|hypothetical protein LOC100253216	[K]	Transcription	Response regulator receiver domain	Two-component response regulator ARR9 GN=F24I3.120 OS=Arabidopsis thaliana (Mouse-ear cress) PE=1 SV=1	PREDICTED: two-component response regulator ARR9 [Vitis vinifera]
