# Supplementary material for: Transcriptome analysis reveals the regulation of brassinosteroids on petal growth in Gerbera hybrida
Source: PeerJ. 2017 May 31;5:e3382. doi: 10.7717/peerj.3382 (PMC5455292; doi:10.7717/peerj.3382)
Supplement: Supplemental Information 6 — Class III DEGs were down-regulated after 10 h BL treatment and did not change markedly after 10 h H2O treatment. [file peerj-05-3382-s006.xlsx]

## Sheet: Sheet1
Supplemental Table S6. Differentially expressed genes in Class Ⅲ .
#ID	Mock	H 0.5	B 0.5	H 10	B 10	COG_class	COG_class_annotation	GO_annotation	KEGG_annotation	KOG_class	KOG_class_annotation	Pfam_annotation	Swissprot_annotation	nr_annotation
GACN01000788.1	37.6474	31.3537	102.053	10.399	22.5673	[MG]	--	Cellular Component: Golgi membrane (GO:0000139);; Cellular Component: endosome (GO:0005768);; Cellular Component: vacuole (GO:0005773);; Cellular Component: trans-Golgi network (GO:0005802);; Cellular Component: cytosol (GO:0005829);; Cellular Component: plasma membrane (GO:0005886);; Molecular Function: dTDP-glucose 4,6-dehydratase activity (GO:0008460);; Biological Process: dTDP-rhamnose biosyn…	--	[GM]	--	NAD dependent epimerase/dehydratase family;; 3-beta hydroxysteroid dehydrogenase/isomerase family;; Male sterility protein;; RmlD substrate binding domain;; Polysaccharide biosynthesis protein	UDP-glucuronic acid decarboxylase 2 GN=F26K9_260 OS=Arabidopsis thaliana (Mouse-ear cress) PE=1 SV=1	PREDICTED: UDP-glucuronic acid decarboxylase 1-like [Vitis vinifera]
GACN01000866.1	15.4101	17.86	16.207	12.5554	4.73843	[I]	Lipid transport and metabolism	Biological Process: long-chain fatty acid metabolic process (GO:0001676);; Biological Process: defense response to insect (GO:0002213);; Biological Process: unsaturated fatty acid biosynthetic process (GO:0006636);; Biological Process: phosphatidylglycerol biosynthetic process (GO:0006655);; Cellular Component: chloroplast (GO:0009507);; Cellular Component: thylakoid (GO:0009579);; Molecular Func…	K00507|1e-147|rcu:RCOM_0900580|delta 9 desaturase, putative (EC:1.14.19.1)	[I]	Lipid transport and metabolism	Fatty acid desaturase	Palmitoyl-monogalactosyldiacylglycerol delta-7 desaturase, chloroplastic (Precursor) GN=ADS3 OS=Arabidopsis thaliana (Mouse-ear cress) PE=2 SV=2	Fatty acid desaturase 5 [Theobroma cacao]
GACN01001068.1	50.8133	35.7287	46.2825	29.8893	10.6835	--	--	Biological Process: metabolic process (GO:0008152);; Molecular Function: raffinose alpha-galactosidase activity (GO:0052692);;	--	--	--	GDSL/SGNH-like Acyl-Esterase family found in Pmr5 and Cas1p;; PMR5 N terminal Domain	--	PREDICTED: uncharacterized protein LOC100255693 [Vitis vinifera]
GACN01003052.1	179.586	150.204	160.421	96.2578	45.3902	[Q]	Secondary metabolites biosynthesis, transport and catabolism	Molecular Function: monooxygenase activity (GO:0004497);; Cellular Component: membrane (GO:0016020);; Molecular Function: oxidoreductase activity, acting on paired donors, with incorporation or reduction of molecular oxygen (GO:0016705);; Biological Process: cyanogenic glycoside biosynthetic process (GO:0019756);; Cellular Component: membrane-bounded organelle (GO:0043227);; Molecular Function: m…	K12153|0.0|vvi:100246526|hypothetical protein LOC100246526	[Q]	Secondary metabolites biosynthesis, transport and catabolism	Cytochrome P450	Valine N-monooxygenase 1 GN=CYP79D1 OS=Manihot esculenta (Cassava) PE=1 SV=1	Cytochrome p450 79a2 [Theobroma cacao]
GACN01005089.1	13.9451	14.03	15.1564	7.20024	2.263	--	--	--	--	--	--	--	Putative cell wall protein (Precursor) GN=At2g20870 OS=Arabidopsis thaliana (Mouse-ear cress) PE=2 SV=2	Gty37 protein [Gerbera hybrid cultivar]
GACN01005090.1	1536.65	1487.71	1448.69	2048.45	672.137	--	--	--	--	--	--	--	Putative cell wall protein (Precursor) GN=At2g20870 OS=Arabidopsis thaliana (Mouse-ear cress) PE=2 SV=2	Gty37 protein [Gerbera hybrid cultivar]
GACN01007419.1	240.994	245.213	231.169	420.302	69.2392	--	--	Cellular Component: cell wall (GO:0005618);; Biological Process: cellular glucan metabolic process (GO:0006073);; Biological Process: response to water deprivation (GO:0009414);; Molecular Function: xyloglucan:xyloglucosyl transferase activity (GO:0016762);; Molecular Function: xyloglucan-specific endo-beta-1,4-glucanase activity (GO:0033946);; Cellular Component: apoplast (GO:0048046);;	K08235|0.0|pop:POPTR_718004|hypothetical protein	--	--	Glycosyl hydrolases family 16;; Xyloglucan endo-transglycosylase (XET) C-terminus	Probable xyloglucan endotransglucosylase/hydrolase protein 7 (Precursor) GN=T28I19.80 OS=Arabidopsis thaliana (Mouse-ear cress) PE=2 SV=2	xyloglucan endotransglucosylase [Gerbera hybrid cultivar]
GACN01007969.1	38.1959	29.5689	30.3224	13.9968	5.73866	[GER]	--	Biological Process: polysaccharide biosynthetic process (GO:0000271);; Cellular Component: plasma membrane (GO:0005886);; Biological Process: water transport (GO:0006833);; Biological Process: pattern specification process (GO:0007389);; Biological Process: regulation of cell size (GO:0008361);; Biological Process: response to salt stress (GO:0009651);; Cellular Component: plant-type vacuole memb…	--	--	--	EamA-like transporter family	Protein WALLS ARE THIN 1 GN=WAT1 OS=Arabidopsis thaliana (Mouse-ear cress) PE=1 SV=1	PREDICTED: auxin-induced protein 5NG4-like [Solanum lycopersicum]
GACN01008542.1	3.15009	2.74419	3.46447	3.6575	0.880437	--	--	Molecular Function: monooxygenase activity (GO:0004497);; Molecular Function: iron ion binding (GO:0005506);; Cellular Component: mitochondrion (GO:0005739);; Molecular Function: electron carrier activity (GO:0009055);; Cellular Component: chloroplast (GO:0009507);; Biological Process: flower development (GO:0009908);; Biological Process: vernalization response (GO:0010048);; Biological Process: …	--	[Q]	Secondary metabolites biosynthesis, transport and catabolism	Cytochrome P450	Cytochrome P450 77A2 GN=CYP77A2 OS=Solanum melongena (Eggplant) PE=2 SV=1	PREDICTED: cytochrome P450 77A2 [Vitis vinifera]
GACN01010171.1	32.8129	27.781	36.5239	34.114	16.7024	--	--	Biological Process: flavonoid biosynthetic process (GO:0009813);; Molecular Function: chalcone isomerase activity (GO:0045430);;	K01859|1e-113|vvi:100233078|CHI, CHI1, CHI2	--	--	Chalcone-flavanone isomerase	Chalcone--flavonone isomerase GN=CHI OS=Saussurea medusa (Saw-wort) PE=2 SV=1	RecName: Full=Chalcone--flavonone isomerase; Short=Chalcone isomerase
GACN01010773.1	75.8425	67.3227	67.1951	54.8239	27.6507	--	--	Molecular Function: carboxylic ester hydrolase activity (GO:0004091);; Cellular Component: extracellular region (GO:0005576);; Biological Process: lipid metabolic process (GO:0006629);;	--	--	--	GDSL-like Lipase/Acylhydrolase	GDSL esterase/lipase At5g33370 (Precursor) GN=At5g33370 OS=Arabidopsis thaliana (Mouse-ear cress) PE=2 SV=1	zinc finger protein, putative [Ricinus communis]
GACN01014475.1	523.121	527.606	530.075	461.593	142.446	--	--	Biological Process: rRNA processing (GO:0006364);; Cellular Component: PSII associated light-harvesting complex II (GO:0009517);; Cellular Component: chloroplast stromal thylakoid (GO:0009533);; Biological Process: response to blue light (GO:0009637);; Biological Process: response to high light intensity (GO:0009644);; Biological Process: response to sucrose (GO:0009744);; Biological Process: pho…	K08916|2e-86|vvi:100246457|hypothetical protein LOC100246457	--	--	Chlorophyll A-B binding protein	Chlorophyll a-b binding protein CP26, chloroplastic (Precursor) GN=LHCB5 OS=Arabidopsis thaliana (Mouse-ear cress) PE=2 SV=1	PREDICTED: chlorophyll a-b binding protein CP26, chloroplastic [Vitis vinifera]
GACN01014758.1	597.242	478.924	496.257	87.1997	42.6039	--	--	Cellular Component: membrane (GO:0016020);; Molecular Function: pectate lyase activity (GO:0030570);;	K01728|7e-28|vvi:100251082|hypothetical protein LOC100251082	--	--	--	Probable pectate lyase 15 (Precursor) GN=At4g13710 OS=Arabidopsis thaliana (Mouse-ear cress) PE=2 SV=1	PREDICTED: probable pectate lyase 15 [Vitis vinifera]
GACN01016010.1	31.6307	29.1567	31.0692	33.2697	15.1809	[Q]	Secondary metabolites biosynthesis, transport and catabolism	Molecular Function: copper ion binding (GO:0005507);; Molecular Function: L-ascorbate oxidase activity (GO:0008447);; Cellular Component: plant-type cell wall (GO:0009505);; Cellular Component: membrane (GO:0016020);; Cellular Component: apoplast (GO:0048046);; Biological Process: oxidation-reduction process (GO:0055114);;	--	[Q]	Secondary metabolites biosynthesis, transport and catabolism	Multicopper oxidase;; Multicopper oxidase	L-ascorbate oxidase homolog (Precursor) OS=Nicotiana tabacum (Common tobacco) PE=1 SV=1	SKU5 similar 5 isoform 3 [Theobroma cacao]
GACN01016350.1	44.4881	48.6273	45.956	50.9807	25.1134	--	--	Molecular Function: transferase activity (GO:0016740);;	--	--	--	Transferase family	Anthocyanin 5-aromatic acyltransferase OS=Gentiana triflora (Clustered gentian) PE=1 SV=1	PREDICTED: anthocyanin 5-aromatic acyltransferase-like [Vitis vinifera]
GACN01016967.1	2.08066	1.93133	2.92735	2.19205	0.345668	--	--	Biological Process: lipid metabolic process (GO:0006629);; Molecular Function: hydrolase activity, acting on ester bonds (GO:0016788);;	--	--	--	GDSL-like Lipase/Acylhydrolase	GDSL esterase/lipase At5g33370 (Precursor) GN=At5g33370 OS=Arabidopsis thaliana (Mouse-ear cress) PE=2 SV=1	PREDICTED: GDSL esterase/lipase At5g33370-like [Solanum lycopersicum]
GACN01017996.1	6.15345	6.08637	6.47815	6.50165	0.435733	--	--	Molecular Function: DNA binding (GO:0003677);; Biological Process: single-multicellular organism process (GO:0044707);; Molecular Function: DBD domain binding (GO:0050692);;	--	--	--	START domain;; Homeobox domain	Homeobox-leucine zipper protein ANTHOCYANINLESS 2 GN=ANL2 OS=Arabidopsis thaliana (Mouse-ear cress) PE=2 SV=1	PREDICTED: homeobox-leucine zipper protein ANTHOCYANINLESS 2 [Vitis vinifera]
GACN01022836.1	6.9867	8.28433	8.22688	8.15351	3.15104	--	--	--	--	--	--	SBP domain	Squamosa promoter-binding-like protein 12 GN=OJ1215_E11.11 OS=Oryza sativa subsp. japonica (Rice) PE=2 SV=1	promoter-binding protein SPL10 [Vitis vinifera]
GACN01022980.1	14.9646	13.4676	13.3457	13.4022	6.02462	--	--	--	--	--	--	--	--	PREDICTED: uncharacterized protein LOC101257508 [Solanum lycopersicum]
GACN01023302.1	12.5234	11.2319	13.138	13.9071	6.21358	--	--	Biological Process: phenylpropanoid metabolic process (GO:0009698);; Molecular Function: anthocyanin 6''-O-malonyltransferase activity (GO:0033809);;	--	--	--	Transferase family	Malonyl-coenzyme A:anthocyanin 3-O-glucoside-6&apos;&apos;-O-malonyltransferase GN=3MAT OS=Dahlia pinnata (Pinnate dahlia) PE=1 SV=1	anthocyanidin 3-O-glucoside-6&apos;&apos;-O-malonyltransferase [Chrysanthemum x morifolium]
GACN01028856.1	26.7572	21.7077	26.9962	34.588	10.034	--	--	Biological Process: metabolic process (GO:0008152);; Molecular Function: oxidoreductase activity (GO:0016491);;	--	--	--	Common central domain of tyrosinase;; Protein of unknown function (DUF_B2219);; Polyphenol oxidase middle domain	Polyphenol oxidase II, chloroplastic (Precursor) GN=co-2 OS=Ipomoea batatas (Sweet potato) PE=2 SV=2	polyphenol oxidase precursor (chloroplast) [Taraxacum officinale]
GACN01028920.1	401.505	416.333	418.563	388.036	164.896	[G]	Carbohydrate transport and metabolism	Molecular Function: hydrolase activity, hydrolyzing O-glycosyl compounds (GO:0004553);; Biological Process: cellular glucan metabolic process (GO:0006073);; Cellular Component: plant-type cell wall (GO:0009505);; Cellular Component: chloroplast (GO:0009507);; Biological Process: response to mechanical stimulus (GO:0009612);; Biological Process: response to low light intensity stimulus (GO:0009645…	K08235|0.0|rcu:RCOM_1438910|Xyloglucan endotransglucosylase/hydrolase protein A precursor, putative (EC:2.4.1.207)	--	--	Glycosyl hydrolases family 16;; Xyloglucan endo-transglycosylase (XET) C-terminus	Probable xyloglucan endotransglucosylase/hydrolase (Precursor; Fragment) GN=XTH OS=Glycine max (Soybean) PE=2 SV=1	xyloglucan endotransglucosylase/hydrolase [Diospyros kaki]
GACN01028929.1	34.447	34.4073	36.1813	20.2298	6.73485	--	--	Biological Process: lipid transport (GO:0006869);; Molecular Function: lipid binding (GO:0008289);;	--	--	--	Protease inhibitor/seed storage/LTP family;; Probable lipid transfer	Non-specific lipid-transfer protein (Precursor) OS=Helianthus annuus (Common sunflower) PE=3 SV=1	non-specific lipid-transfer protein [Helianthus annuus]
GACN01028967.1	445.197	415.152	444.469	406.841	206.609	--	--	Biological Process: rRNA processing (GO:0006364);; Cellular Component: photosystem I (GO:0009522);; Cellular Component: photosystem II (GO:0009523);; Cellular Component: chloroplast thylakoid membrane (GO:0009535);; Biological Process: response to blue light (GO:0009637);; Biological Process: response to high light intensity (GO:0009644);; Biological Process: response to sucrose (GO:0009744);; Bi…	K08907|1e-160|vvi:100263275|hypothetical protein LOC100263275	--	--	Chlorophyll A-B binding protein	Chlorophyll a-b binding protein 6A, chloroplastic (Precursor) GN=CAB6A OS=Solanum lycopersicum (Tomato) PE=2 SV=1	PREDICTED: chlorophyll a-b binding protein 6A, chloroplastic-like [Fragaria vesca subsp. vesca]
GACN01028968.1	284.481	309.86	313.266	105.48	52.2478	--	--	Biological Process: anthocyanin-containing compound biosynthetic process (GO:0009718);; Biological Process: response to sucrose (GO:0009744);; Biological Process: response to UV-B (GO:0010224);; Biological Process: cellular modified amino acid biosynthetic process (GO:0042398);; Molecular Function: chalcone isomerase activity (GO:0045430);; Biological Process: response to karrikin (GO:0080167);;	--	--	--	Chalcone-flavanone isomerase	Probable chalcone--flavonone isomerase 3 GN=K18I23.7 OS=Arabidopsis thaliana (Mouse-ear cress) PE=1 SV=1	chalcone isomerase [Gossypium hirsutum]
GACN01028985.1	206.966	195.967	192.327	243.359	94.518	--	--	Molecular Function: enzyme inhibitor activity (GO:0004857);; Cellular Component: cytoplasm (GO:0005737);; Cellular Component: plasma membrane (GO:0005886);; Cellular Component: plant-type cell wall (GO:0009505);; Biological Process: response to nematode (GO:0009624);; Molecular Function: pectinesterase activity (GO:0030599);; Biological Process: cell wall modification (GO:0042545);; Biological Pr…	K01051|0.0|pop:POPTR_553829|hypothetical protein	--	--	Pectinesterase;; Plant invertase/pectin methylesterase inhibitor	Pectinesterase 3 (Precursor) OS=Citrus sinensis (Sweet orange) PE=1 SV=1	predicted protein [Populus trichocarpa]
GACN01029034.1	195.152	180.188	189.128	179.221	75.357	--	--	--	--	--	--	Plant invertase/pectin methylesterase inhibitor	21 kDa protein (Precursor) OS=Daucus carota (Carrot) PE=2 SV=1	PREDICTED: 21 kDa protein-like [Solanum lycopersicum]
GACN01029064.1	90.0925	49.6058	61.5463	55.4142	26.193	--	--	--	--	--	--	--	--	PREDICTED: uncharacterized protein LOC100813475 [Glycine max]
GACN01029093.1	152.153	129.631	165.214	88.939	35.4997	[M]	Cell wall/membrane/envelope biogenesis	--	--	[O]	Posttranslational modification, protein turnover, chaperones	--	Sulfated surface glycoprotein 185 (Precursor) OS=Volvox carteri (Green alga) PE=1 SV=1	hypothetical protein PRUPE_ppb014454mg [Prunus persica]
GACN01029105.1	56.0087	52.8864	67.4295	53.9766	20.2118	--	--	Cellular Component: nucleus (GO:0005634);; Cellular Component: cytoplasm (GO:0005737);; Biological Process: double fertilization forming a zygote and endosperm (GO:0009567);; Molecular Function: anthranilate N-benzoyltransferase activity (GO:0047672);;	--	--	--	Transferase family	Omega-hydroxypalmitate O-feruloyl transferase GN=MEE6.11 OS=Arabidopsis thaliana (Mouse-ear cress) PE=1 SV=1	PREDICTED: omega-hydroxypalmitate O-feruloyl transferase [Vitis vinifera]
GACN01029258.1	327.729	287.17	262.54	233.49	104.505	--	--	--	--	--	--	--	--	Gty37 protein [Gerbera hybrid cultivar]
GACN01029424.1	157.056	140.751	165.692	194.983	78.5906	--	--	--	--	--	--	Pollen proteins Ole e I like	Pistil-specific extensin-like protein (Precursor) OS=Nicotiana tabacum (Common tobacco) PE=2 SV=1	arabinogalactan protein [Daucus carota]
GACN01029465.1	96.8358	93.8094	92.1201	106.884	44.5343	[O]	Posttranslational modification, protein turnover, chaperones	Biological Process: response to stress (GO:0006950);;	--	[O]	Posttranslational modification, protein turnover, chaperones	Hsp20/alpha crystallin family	Heat shock 22 kDa protein, mitochondrial (Precursor) GN=HSP22 OS=Pisum sativum (Garden pea) PE=2 SV=1	Mitochondrion-localized small heat shock protein 23.6, putative isoform 1 [Theobroma cacao]
GACN01029833.1	629.07	624.882	629.765	597.972	302.107	--	--	Molecular Function: carboxylic ester hydrolase activity (GO:0004091);; Cellular Component: extracellular region (GO:0005576);; Biological Process: lipid metabolic process (GO:0006629);;	--	--	--	GDSL-like Lipase/Acylhydrolase	GDSL esterase/lipase At5g33370 (Precursor) GN=At5g33370 OS=Arabidopsis thaliana (Mouse-ear cress) PE=2 SV=1	PREDICTED: GDSL esterase/lipase At5g33370-like isoform 1 [Solanum lycopersicum]
GACN01030442.1	17.7887	8.63912	24.4019	15.0032	5.52274	[Q]	Secondary metabolites biosynthesis, transport and catabolism	Molecular Function: monooxygenase activity (GO:0004497);; Molecular Function: iron ion binding (GO:0005506);; Molecular Function: electron carrier activity (GO:0009055);; Cellular Component: integral component of membrane (GO:0016021);; Biological Process: brassinosteroid biosynthetic process (GO:0016132);; Molecular Function: oxidoreductase activity, acting on paired donors, with incorporation o…	--	[QI]	--	Cytochrome P450	Cytochrome P450 85A1 GN=CYP85A1 OS=Solanum lycopersicum (Tomato) PE=2 SV=1	unnamed protein product [Vitis vinifera]
GACN01030561.1	5.87062	5.18347	3.60825	6.86376	0.989582	--	--	Molecular Function: oxidoreductase activity (GO:0016491);;	--	--	--	Glyoxal oxidase N-terminus;; Domain of unknown function (DUF1929);; Galactose oxidase, central domain	--	Glyoxal oxidase-related protein [Theobroma cacao]
GACN01038125.1	14.1785	9.87069	8.792	11.7158	4.08292	--	--	Molecular Function: diacylglycerol O-acyltransferase activity (GO:0004144);; Biological Process: glycerolipid biosynthetic process (GO:0045017);;	--	--	--	Protein of unknown function (DUF1298);; Wax ester synthase-like Acyl-CoA acyltransferase domain	O-acyltransferase WSD1 GN=WSD1 OS=Arabidopsis thaliana (Mouse-ear cress) PE=2 SV=1	conserved hypothetical protein [Ricinus communis]
GACN01039593.1	23.5216	15.1529	15.6558	17.6147	7.70533	[IQ]	--	Cellular Component: peroxisome (GO:0005777);; Biological Process: metabolic process (GO:0008152);; Molecular Function: o-succinylbenzoate-CoA ligase activity (GO:0008756);;	--	[I]	Lipid transport and metabolism	AMP-binding enzyme;; AMP-binding enzyme C-terminal domain	Probable acyl-activating enzyme 6 GN=MQK4.6 OS=Arabidopsis thaliana (Mouse-ear cress) PE=2 SV=1	Acyl activating enzyme 5 [Theobroma cacao]
GACN01040190.1	69.4807	95.3081	86.3195	86.3178	42.4184	[C]	Energy production and conversion	Molecular Function: zinc ion binding (GO:0008270);; Molecular Function: oxidoreductase activity (GO:0016491);; Biological Process: oxidation-reduction process (GO:0055114);;	--	[Q]	Secondary metabolites biosynthesis, transport and catabolism	Alcohol dehydrogenase GroES-like domain;; Zinc-binding dehydrogenase	Alcohol dehydrogenase-like 1 GN=At1g22430 OS=Arabidopsis thaliana (Mouse-ear cress) PE=2 SV=1	alcohol dehydrogenase 1 [Artemisia annua]
GACN01040588.1	15.4567	15.8998	15.7368	12.4935	4.37804	--	--	Molecular Function: inorganic anion exchanger activity (GO:0005452);; Cellular Component: endosome (GO:0005768);; Cellular Component: vacuole (GO:0005773);; Cellular Component: integral component of membrane (GO:0016021);; Cellular Component: lateral plasma membrane (GO:0016328);; Biological Process: borate transmembrane transport (GO:0035445);; Cellular Component: columella (GO:0043674);; Molecu…	--	[P]	Inorganic ion transport and metabolism	HCO3- transporter family	Boron transporter 1 GN=BOR1 OS=Arabidopsis thaliana (Mouse-ear cress) PE=1 SV=1	boron transporter [Cichorium intybus]
GACN01041796.1	40.7957	24.4612	23.0697	26.3344	9.41279	--	--	--	--	--	--	--	--	Uncharacterized protein TCM_038540 [Theobroma cacao]
GACN01044829.1	55.4096	73.747	68.2774	17.1101	4.5523	--	--	--	--	--	--	HAD superfamily, subfamily IIIB (Acid phosphatase)	Acid phosphatase 1 (Precursor) GN=APS1 OS=Solanum lycopersicum (Tomato) PE=2 SV=1	PREDICTED: acid phosphatase 1-like [Solanum lycopersicum]
