# Supplementary material for: Transcriptome analysis reveals the regulation of brassinosteroids on petal growth in Gerbera hybrida
Source: PeerJ. 2017 May 31;5:e3382. doi: 10.7717/peerj.3382 (PMC5455292; doi:10.7717/peerj.3382)
Supplement: Supplemental Information 7 — Class IV DEGs were up-regulated after 10 h BL treatment and did not change markedly after 10 h H2O treatment. [file peerj-05-3382-s007.xlsx]

## Sheet: Sheet1
Supplemental Table S7. Differentially expressed genes in Class Ⅳ .
#ID	Mock	H 0.5	B 0.5	H 10	B 10	COG_class	COG_class_annotation	GO_annotation	KEGG_annotation	KOG_class	KOG_class_annotation	Pfam_annotation	Swissprot_annotation	nr_annotation
GACN01001710.1	84.625	93.9797	94.2697	78.138	276.484	[J]	Translation, ribosomal structure and biogenesis	Molecular Function: translation elongation factor activity (GO:0003746);; Molecular Function: GTPase activity (GO:0003924);; Molecular Function: calmodulin binding (GO:0005516);; Molecular Function: GTP binding (GO:0005525);; Cellular Component: nucleolus (GO:0005730);; Cellular Component: mitochondrion (GO:0005739);; Cellular Component: vacuole (GO:0005773);; Cellular Component: Golgi apparatus …	K03231|0.0|pop:POPTR_674089|hypothetical protein	[J]	Translation, ribosomal structure and biogenesis	Elongation factor Tu GTP binding domain;; 50S ribosome-binding GTPase	Elongation factor 1-alpha GN=REFA4 OS=Oryza sativa subsp. japonica (Rice) PE=2 SV=2	GTP binding Elongation factor Tu family protein isoform 3, partial [Theobroma cacao]
GACN01007815.1	398.213	328.861	430.556	381.932	1068.74	[O]	Posttranslational modification, protein turnover, chaperones	Biological Process: response to stress (GO:0006950);; Biological Process: response to organic substance (GO:0010033);; Molecular Function: transferase activity (GO:0016740);; Biological Process: primary metabolic process (GO:0044238);; Biological Process: cellular catabolic process (GO:0044248);; Biological Process: single-organism metabolic process (GO:0044710);; Biological Process: organic subs…	--	[O]	Posttranslational modification, protein turnover, chaperones	Glutathione S-transferase, N-terminal domain;; Glutathione S-transferase, N-terminal domain;; Glutathione S-transferase, N-terminal domain;; Glutathione S-transferase, C-terminal domain;; Glutathione S-transferase, C-terminal domain	Probable glutathione S-transferase GN=HSP26-A OS=Glycine max (Soybean) PE=2 SV=1	PREDICTED: probable glutathione S-transferase-like [Fragaria vesca subsp. vesca]
GACN01008884.1	3.04769	8.14026	10.4484	2.02835	29.0763	--	--	Molecular Function: transferase activity, transferring glycosyl groups (GO:0016757);;	--	[GC]	--	--	Cyanidin-3-O-glucoside 2-O-glucuronosyltransferase GN=UGAT OS=Bellis perennis (Daisy) PE=1 SV=1	PREDICTED: cyanidin-3-O-glucoside 2-O-glucuronosyltransferase-like [Solanum lycopersicum]
GACN01009625.1	27.7842	17.7313	23.7021	21.0225	66.3495	[O]	Posttranslational modification, protein turnover, chaperones	Molecular Function: glutathione transferase activity (GO:0004364);; Cellular Component: cytoplasm (GO:0005737);; Biological Process: protein glutathionylation (GO:0010731);; Biological Process: response to cadmium ion (GO:0046686);;	--	[O]	Posttranslational modification, protein turnover, chaperones	Glutathione S-transferase, N-terminal domain;; Glutathione S-transferase, N-terminal domain;; Glutathione S-transferase, C-terminal domain;; Glutathione S-transferase, C-terminal domain;; Glutathione S-transferase, N-terminal domain	Glutathione S-transferase L3 GN=GSTL3 OS=Arabidopsis thaliana (Mouse-ear cress) PE=2 SV=1	glutathione S-transferase omega [Jatropha curcas]
GACN01009626.1	33.3855	30.6741	27.1389	22.4303	67.4706	[O]	Posttranslational modification, protein turnover, chaperones	Molecular Function: glutathione transferase activity (GO:0004364);; Biological Process: toxin catabolic process (GO:0009407);; Cellular Component: chloroplast stroma (GO:0009570);; Biological Process: response to cyclopentenone (GO:0010583);; Biological Process: protein glutathionylation (GO:0010731);; Biological Process: response to cadmium ion (GO:0046686);;	--	[O]	Posttranslational modification, protein turnover, chaperones	Glutathione S-transferase, N-terminal domain;; Glutathione S-transferase, N-terminal domain;; Glutathione S-transferase, C-terminal domain;; Glutathione S-transferase, C-terminal domain;; Glutathione S-transferase, N-terminal domain	Glutathione S-transferase L3 GN=GSTL3 OS=Arabidopsis thaliana (Mouse-ear cress) PE=2 SV=1	Glutathione S-transferase family protein isoform 1 [Theobroma cacao]
GACN01009920.1	4.79266	3.78544	10.1294	8.03129	33.4542	--	--	--	--	--	--	AP2 domain	Ethylene-responsive transcription factor 2 GN=MQL5.7 OS=Arabidopsis thaliana (Mouse-ear cress) PE=2 SV=1	AP2 domain class transcription factor [Malus domestica]
GACN01010338.1	3.38058	3.17871	3.53323	1.16724	46.7276	[C]	Energy production and conversion	Cellular Component: plasma membrane (GO:0005886);; Biological Process: auxin-activated signaling pathway (GO:0009734);; Cellular Component: chloroplast envelope (GO:0009941);; Biological Process: response to cadmium ion (GO:0046686);; Molecular Function: pyridoxine:NADP 4-dehydrogenase activity (GO:0050236);; Biological Process: oxidation-reduction process (GO:0055114);;	--	[C]	Energy production and conversion	Aldo/keto reductase family	Auxin-induced protein PCNT115 OS=Nicotiana tabacum (Common tobacco) PE=2 SV=1	aldo/keto reductase, putative [Ricinus communis]
GACN01011876.1	23.6442	13.416	16.0169	27.3691	56.5827	[Q]	Secondary metabolites biosynthesis, transport and catabolism	Molecular Function: hydrolase activity (GO:0016787);; Cellular Component: intracellular part (GO:0044424);;	--	[R]	General function prediction only	Dienelactone hydrolase family;; Alpha/beta hydrolase family;; Alpha/beta hydrolase family	Endo-1,3;1,4-beta-D-glucanase (Precursor) OS=Zea mays (Maize) PE=1 SV=1	dienelactone hydrolase-1 [Beta vulgaris]
GACN01011971.1	38.8182	34.3174	38.0519	34.9531	156.825	[O]	Posttranslational modification, protein turnover, chaperones	Molecular Function: glutathione transferase activity (GO:0004364);; Molecular Function: lactoylglutathione lyase activity (GO:0004462);; Cellular Component: plasma membrane (GO:0005886);; Biological Process: response to oxidative stress (GO:0006979);; Biological Process: response to cold (GO:0009409);; Cellular Component: chloroplast stroma (GO:0009570);; Biological Process: response to herbicide…	--	[O]	Posttranslational modification, protein turnover, chaperones	Glutathione S-transferase, N-terminal domain;; Glutathione S-transferase, N-terminal domain;; Glutathione S-transferase, C-terminal domain;; Glutathione S-transferase, C-terminal domain;; Glutathione S-transferase, N-terminal domain	Probable glutathione S-transferase OS=Nicotiana tabacum (Common tobacco) PE=2 SV=1	glutathione S-transferase [Cichorium intybus x Cichorium endivia]
GACN01012551.1	11.9299	10.7076	11.2847	8.38804	39.9131	--	--	Cellular Component: extracellular region (GO:0005576);; Biological Process: syncytium formation (GO:0006949);; Cellular Component: plant-type cell wall (GO:0009505);; Biological Process: response to gibberellin (GO:0009739);; Biological Process: unidimensional cell growth (GO:0009826);; Biological Process: plant-type cell wall loosening (GO:0009828);; Biological Process: response to red light (GO…	--	--	--	Rare lipoprotein A (RlpA)-like double-psi beta-barrel;; Pollen allergen	Expansin-A1 (Precursor) GN=F10D13_18 OS=Arabidopsis thaliana (Mouse-ear cress) PE=2 SV=1	Alpha-expansin 1 precursor, putative [Ricinus communis]
GACN01017190.1	251.436	285.567	355.868	279.756	1271.91	--	--	Biological Process: carbohydrate metabolic process (GO:0005975);; Molecular Function: beta-glucosidase activity (GO:0008422);; Cellular Component: plant-type cell wall (GO:0009505);; Biological Process: seed coat development (GO:0010214);; Molecular Function: alpha-N-arabinofuranosidase activity (GO:0046556);; Cellular Component: apoplast (GO:0048046);;	--	--	--	Glycosyl hydrolase family 3 N terminal domain;; Glycosyl hydrolase family 3 C-terminal domain;; Fibronectin type III-like domain	Beta-D-xylosidase 1 (Precursor) GN=K7J8.3 OS=Arabidopsis thaliana (Mouse-ear cress) PE=1 SV=1	beta-D-xylosidase [Pyrus pyrifolia]
GACN01019160.1	21.6074	15.6095	17.993	19.9555	72.8453	--	--	Cellular Component: plasma membrane (GO:0005886);; Biological Process: response to oxidative stress (GO:0006979);; Biological Process: response to cold (GO:0009409);; Cellular Component: chloroplast stroma (GO:0009570);; Biological Process: response to herbicide (GO:0009635);; Molecular Function: transferase activity (GO:0016740);; Biological Process: cellular response to water deprivation (GO:00…	K00799|1e-11|pop:POPTR_834140|hypothetical protein	[O]	Posttranslational modification, protein turnover, chaperones	--	Probable glutathione S-transferase parA GN=PARA OS=Nicotiana tabacum (Common tobacco) PE=2 SV=1	glutathione S-transferase [Cichorium intybus x Cichorium endivia]
GACN01021238.1	6.06392	11.4036	17.9569	10.8176	107.391	[R]	General function prediction only	Cellular Component: cytosol (GO:0005829);; Biological Process: response to salt stress (GO:0009651);; Molecular Function: oxidoreductase activity (GO:0016491);; Biological Process: oxidation-reduction process (GO:0055114);;	--	[R]	General function prediction only	Aldo/keto reductase family	Methylecgonone reductase OS=Erythroxylum coca (Coca plant) PE=1 SV=1	unknown [Glycine max]
GACN01021852.1	130.147	135.555	189.821	152.925	658.364	[G]	Carbohydrate transport and metabolism	Biological Process: carbohydrate metabolic process (GO:0005975);; Cellular Component: plant-type cell wall (GO:0009505);; Biological Process: seed coat development (GO:0010214);; Molecular Function: alpha-N-arabinofuranosidase activity (GO:0046556);; Biological Process: response to arsenic-containing substance (GO:0046685);; Cellular Component: apoplast (GO:0048046);;	--	--	--	--	Beta-D-xylosidase 1 (Precursor) GN=K7J8.3 OS=Arabidopsis thaliana (Mouse-ear cress) PE=1 SV=1	Periplasmic beta-glucosidase precursor, putative [Ricinus communis]
GACN01023959.1	5.27011	10.9845	4.49826	9.55316	24.8129	[P]	Inorganic ion transport and metabolism	Cellular Component: plasma membrane (GO:0005886);; Cellular Component: plant-type vacuole membrane (GO:0009705);; Molecular Function: nitrate transmembrane transporter activity (GO:0015112);; Biological Process: nitrate transport (GO:0015706);; Cellular Component: integral component of membrane (GO:0016021);; Biological Process: transmembrane transport (GO:0055085);;	--	--	--	--	High affinity nitrate transporter 2.7 GN=NRT2.7 OS=Arabidopsis thaliana (Mouse-ear cress) PE=2 SV=1	PREDICTED: high affinity nitrate transporter 2.7-like [Fragaria vesca subsp. vesca]
GACN01024984.1	5.54415	10.542	10.8164	6.84884	61.3066	[R]	General function prediction only	Molecular Function: 6'-deoxychalcone synthase activity (GO:0033808);; Molecular Function: L-glucuronate reductase activity (GO:0047939);; Biological Process: oxidation-reduction process (GO:0055114);;	--	[R]	General function prediction only	Aldo/keto reductase family	Probable NAD(P)H-dependent oxidoreductase 2 OS=Oryza sativa subsp. japonica (Rice) PE=2 SV=1	PREDICTED: probable NAD(P)H-dependent oxidoreductase 1 [Vitis vinifera]
GACN01029887.1	40.6191	35.9601	44.7014	32.7247	128.461	[J]	Translation, ribosomal structure and biogenesis	Molecular Function: translation elongation factor activity (GO:0003746);; Molecular Function: GTPase activity (GO:0003924);; Molecular Function: calmodulin binding (GO:0005516);; Molecular Function: GTP binding (GO:0005525);; Cellular Component: nucleolus (GO:0005730);; Cellular Component: mitochondrion (GO:0005739);; Cellular Component: vacuolar membrane (GO:0005774);; Cellular Component: Golgi …	K03231|0.0|ath:AT1G07920|elongation factor 1-alpha / EF-1-alpha	[J]	Translation, ribosomal structure and biogenesis	Elongation factor Tu C-terminal domain;; Elongation factor Tu domain 2;; Elongation factor Tu GTP binding domain	Elongation factor 1-alpha 4 GN=A4 OS=Arabidopsis thaliana (Mouse-ear cress) PE=1 SV=2	hypothetical protein CARUB_v100092941mg, partial [Capsella rubella]
GACN01030551.1	11.4041	18.2843	15.6883	15.9018	43.1971	[R]	General function prediction only	Molecular Function: GTPase activity (GO:0003924);; Molecular Function: GTP binding (GO:0005525);; Cellular Component: nucleus (GO:0005634);; Cellular Component: Golgi apparatus (GO:0005794);; Biological Process: GTP catabolic process (GO:0006184);; Biological Process: mRNA export from nucleus (GO:0006406);; Biological Process: protein import into nucleus (GO:0006606);; Biological Process: small G…	K07936|1e-40|rcu:RCOM_0925020|ran, putative	[U]	Intracellular trafficking, secretion, and vesicular transport	--	GTP-binding nuclear protein Ran1A (Fragment) GN=RAN1A OS=Lotus japonicus (Lotus corniculatus var. japonicus) PE=2 SV=1	unknown [Medicago truncatula]
GACN01031073.1	47.7087	46.1354	57.53	38.2542	167.791	[R]	General function prediction only	Molecular Function: zinc ion binding (GO:0008270);; Biological Process: response to bacterium (GO:0009617);; Biological Process: plant-type hypersensitive response (GO:0009626);; Biological Process: lignin biosynthetic process (GO:0009809);; Molecular Function: aryl-alcohol dehydrogenase (NAD+) activity (GO:0018456);; Molecular Function: cinnamyl-alcohol dehydrogenase activity (GO:0045551);; Mole…	--	[Q]	Secondary metabolites biosynthesis, transport and catabolism	Alcohol dehydrogenase GroES-like domain;; Zinc-binding dehydrogenase;; D-isomer specific 2-hydroxyacid dehydrogenase, NAD binding domain	8-hydroxygeraniol dehydrogenase GN=10HGO OS=Catharanthus roseus (Madagascar periwinkle) PE=1 SV=1	10-hydroxygeraniol oxidoreductase [Codonopsis lanceolata]
GACN01032819.1	9.04725	7.93987	15.2973	5.248	42.5184	--	--	Biological Process: metabolic process (GO:0008152);; Molecular Function: UDP-glucosyltransferase activity (GO:0035251);;	--	[GC]	--	--	UDP-glycosyltransferase 89B1 GN=UGT89B1 OS=Arabidopsis thaliana (Mouse-ear cress) PE=2 SV=2	PREDICTED: UDP-glycosyltransferase 89B1-like [Vitis vinifera]
GACN01037472.1	44.4394	47.4615	58.0859	76.8097	173.521	--	--	Cellular Component: nucleus (GO:0005634);; Cellular Component: cytoplasm (GO:0005737);;	--	--	--	--	--	uncharacterized protein [Arabidopsis thaliana]
GACN01040846.1	14.7396	9.36119	10.3001	6.24995	50.2637	--	--	Biological Process: carbohydrate metabolic process (GO:0005975);; Molecular Function: transferase activity, transferring glycosyl groups (GO:0016757);;	--	[GC]	--	UDP-glucoronosyl and UDP-glucosyl transferase	Anthocyanidin 3-O-glucoside 5-O-glucosyltransferase (Precursor) GN=HGT8 OS=Verbena hybrida (Garden vervain) PE=2 SV=1	UDP-glucose:flavonoid 7-O-glucosyltransferase [Malus domestica]
GACN01042272.1	8.05269	5.62151	4.16564	2.35914	16.4431	--	--	Cellular Component: extracellular region (GO:0005576);; Biological Process: plant-type cell wall organization (GO:0009664);; Cellular Component: membrane (GO:0016020);;	--	--	--	Pollen allergen	Expansin-A10 (Precursor) OS=Arabidopsis thaliana (Mouse-ear cress) PE=2 SV=1	alpha-expansin 6 [Gossypium raimondii]
GACN01045599.1	10.1388	9.0287	10.0841	7.88003	25.1432	[V]	Defense mechanisms	Cellular Component: vacuolar membrane (GO:0005774);; Cellular Component: plasma membrane (GO:0005886);; Biological Process: drug transmembrane transport (GO:0006855);; Biological Process: response to symbiotic fungus (GO:0009610);; Molecular Function: drug transmembrane transporter activity (GO:0015238);; Molecular Function: antiporter activity (GO:0015297);; Biological Process: proline transport…	--	[R]	General function prediction only	MatE	Protein TRANSPARENT TESTA 12 GN=F17J16_80 OS=Arabidopsis thaliana (Mouse-ear cress) PE=2 SV=1	PREDICTED: protein TRANSPARENT TESTA 12 [Vitis vinifera]
GACN01045759.1	60.0744	64.2262	79.0453	41.6311	192.199	[R]	General function prediction only	Molecular Function: IMP dehydrogenase activity (GO:0003938);; Cellular Component: mitochondrion (GO:0005739);; Cellular Component: cytosol (GO:0005829);; Biological Process: response to symbiotic fungus (GO:0009610);; Molecular Function: oxidoreductase activity, acting on single donors with incorporation of molecular oxygen, incorporation of two atoms of oxygen (GO:0016702);; Molecular Function: …	--	--	--	Nitronate monooxygenase;; FMN-dependent dehydrogenase;; IMP dehydrogenase / GMP reductase domain	--	PREDICTED: probable nitronate monooxygenase-like [Solanum lycopersicum]
